# Supplementary material for: Quantifying the impacts of symbiotic interactions between two invasive species: the tawny crazy ant (Nylanderia fulva) tending the sorghum aphid (Melanaphis sorghi)
Source: PeerJ. 2022 Dec 12;10:e14448. doi: 10.7717/peerj.14448 (PMC9753752; doi:10.7717/peerj.14448)
Supplement: Supplemental Information 1 — Each aphid clone used in this experiment contains host plant information and supporting collection information. [file peerj-10-14448-s001.xlsx]

## Sheet: Sheet1
Sample	Year	Host	Aphid Clone (AC)	Location	County/Parish	State	Date Collected	Coordinates	Collector	Notes
15a	2018	sugarcane	34	NA	Iberville Parish	LA	2014-07-28	NA	Blaine Viator via Scott Armstrong	NA
15b	2018	sugarcane	34	NA	Iberville Parish	LA	2014-07-28	NA	Blaine Viator via Scott Armstrong	NA
15ca	2018	sugarcane	34	NA	Iberville Parish	LA	2014-07-28	NA	Blaine Viator via Scott Armstrong	NA
15cb	2018	sugarcane	34	NA	Iberville Parish	LA	2014-07-28	NA	Blaine Viator via Scott Armstrong	NA
16a	2018	sorghum	20	Winnsboro	Franklin Parish	LA	2013-12-03	32°08'23.48"N;91°41'33.21"W	Williams via Scott Armstrong	Macon Ridge Station, LA
16b	2018	sorghum	20	Winnsboro	Franklin Parish	LA	2013-12-03	32°08'23.48"N;91°41'33.21"W	Williams via Scott Armstrong	Macon Ridge Station, LA
16ca	2018	sorghum	20	Winnsboro	Franklin Parish	LA	2013-12-03	32°08'23.48"N;91°41'33.21"W	Williams via Scott Armstrong	Macon Ridge Station, LA
16cb	2018	sorghum	20	Winnsboro	Franklin Parish	LA	2013-12-03	32°08'23.48"N;91°41'33.21"W	Williams via Scott Armstrong	Macon Ridge Station, LA
17a	2018	sorghum	20	Winnsboro	Franklin Parish	LA	2013-12-03	32°08'23.48"N;91°41'33.21"W	Williams via Scott Armstrong	Macon Ridge Station, LA
17b	2018	sorghum	20	Winnsboro	Franklin Parish	LA	2013-12-03	32°08'23.48"N;91°41'33.21"W	Williams via Scott Armstrong	Macon Ridge Station, LA
17ca	2018	sorghum	20	Winnsboro	Franklin Parish	LA	2013-12-03	32°08'23.48"N;91°41'33.21"W	Williams via Scott Armstrong	Macon Ridge Station, LA
17cb	2018	sorghum	20	Winnsboro	Franklin Parish	LA	2013-12-03	32°08'23.48"N;91°41'33.21"W	Williams via Scott Armstrong	Macon Ridge Station, LA
18a	2018	sugarcane	SC	NA	NA	LA	~2017	NA	Greg Wilson	NA
18b	2018	sugarcane	SC	NA	NA	LA	~2017	NA	Greg Wilson	NA
18ca	2018	sugarcane	SC	NA	NA	LA	~2017	NA	Greg Wilson	NA
18cb	2018	sugarcane	SC	NA	NA	LA	~2017	NA	Greg Wilson	NA
19a	2018	sorghum	Weslaco	Weslaco	Hidalgo	TX	Oct 2016	NA	Danielle Sekula	NA
19b	2018	sorghum	Weslaco	Weslaco	Hidalgo	TX	Oct 2016	NA	Danielle Sekula	NA
19ca	2018	sorghum	Weslaco	Weslaco	Hidalgo	TX	Oct 2016	NA	Danielle Sekula	NA
19cb	2018	sorghum	Weslaco	Weslaco	Hidalgo	TX	Oct 2016	NA	Danielle Sekula	NA
22a	2019	sugarcane	SC	NA	Franklin Parish	LA	~2017	NA	Greg Wilson	NA
22b	2019	sugarcane	SC	NA	Franklin Parish	LA	~2017	NA	Greg Wilson	NA
22ca	2019	sugarcane	SC	NA	Franklin Parish	LA	~2017	NA	Greg Wilson	NA
22cb	2019	sugarcane	SC	NA	Franklin Parish	LA	~2017	NA	Greg Wilson	NA
23a	2019	Johnson grass	JJJ2	College Station	Brazos	TX	2019-05-20	30° 31' 55" N 96° 13' 43'' W	Jocelyn R. Holt	NA
23b	2019	Johnson grass	JJJ2	College Station	Brazos	TX	2019-05-20	30° 31' 55" N 96° 13' 43'' W	Jocelyn R. Holt	NA
23ca	2019	Johnson grass	JJJ2	College Station	Brazos	TX	2019-05-20	30° 31' 55" N 96° 13' 43'' W	Jocelyn R. Holt	NA
23cb	2019	Johnson grass	JJJ2	College Station	Brazos	TX	2019-05-20	30° 31' 55" N 96° 13' 43'' W	Jocelyn R. Holt	NA
25a	2020	Johnson grass	AG1	NA	NA	TX	xx2020	NA	Jocelyn R. Holt	NA
25b	2020	Johnson grass	AG1	NA	NA	TX	xx2020	NA	Jocelyn R. Holt	NA
25ca	2020	Johnson grass	AG1	NA	NA	TX	xx2020	NA	Jocelyn R. Holt	NA
25cb	2020	Johnson grass	AG1	NA	NA	TX	xx2020	NA	Jocelyn R. Holt	NA
26a	2020	sugarcane	SC	NA	NA	LA	~2017	NA	Greg Wilson	NA
26b	2020	sugarcane	SC	NA	NA	LA	~2017	NA	Greg Wilson	NA
26ca	2020	sugarcane	SC	NA	NA	LA	~2017	NA	Greg Wilson	NA
26cb	2020	sugarcane	SC	NA	NA	LA	~2017	NA	Greg Wilson	NA
27a	2020	Johnson grass	AH1	Hearne	Robertson	TX	xx2020	30°51'47"N 96°18'39''W	Jocelyn R. Holt	NA
27b	2020	Johnson grass	AH1	Hearne	Robertson	TX	xx2020	30°51'47"N 96°18'39''W	Jocelyn R. Holt	NA
27ca	2020	Johnson grass	AH1	Hearne	Robertson	TX	xx2020	30°51'47"N 96°18'39''W	Jocelyn R. Holt	NA
27cb	2020	Johnson grass	AH1	Hearne	Robertson	TX	xx2020	30°51'47"N 96°18'39''W	Jocelyn R. Holt	NA
28a	2020	sugarcane	SC	NA	Franklin Parish	LA	~2017	NA	Greg Wilson	NA
28b	2020	sugarcane	SC	NA	Franklin Parish	LA	~2017	NA	Greg Wilson	NA
28ca	2020	sugarcane	SC	NA	Franklin Parish	LA	~2017	NA	Greg Wilson	NA
28cb	2020	sugarcane	SC	NA	Franklin Parish	LA	~2017	NA	Greg Wilson	NA
29a	2020	sugarcane	SC	NA	Franklin Parish	LA	~2017	NA	Greg Wilson	NA
29b	2020	sugarcane	SC	NA	Franklin Parish	LA	~2017	NA	Greg Wilson	NA
29ca	2020	sugarcane	SC	NA	Franklin Parish	LA	~2017	NA	Greg Wilson	NA
29cb	2020	sugarcane	SC	NA	Franklin Parish	LA	~2017	NA	Greg Wilson	NA
30a	2020	Johnson grass	AI1	Austin	Travis	TX	xx2020	30°13'56.9"N 97°59'59.7''W	Jocelyn R. Holt	NA
30b	2020	Johnson grass	AI1	Austin	Travis	TX	xx2020	30°13'56.9"N 97°59'59.7''W	Jocelyn R. Holt	NA
30ca	2020	Johnson grass	AI1	Austin	Travis	TX	xx2020	30°13'56.9"N 97°59'59.7''W	Jocelyn R. Holt	NA
30cb	2020	Johnson grass	AI1	Austin	Travis	TX	xx2020	30°13'56.9"N 97°59'59.7''W	Jocelyn R. Holt	NA
