# Supplementary material for: Quantifying the impacts of symbiotic interactions between two invasive species: the tawny crazy ant (Nylanderia fulva) tending the sorghum aphid (Melanaphis sorghi)
Source: PeerJ. 2022 Dec 12;10:e14448. doi: 10.7717/peerj.14448 (PMC9753752; doi:10.7717/peerj.14448)
Supplement: Supplemental Information 5 — The raw data and calculations used to generate data in for the ant-aphid interaction analysis: the treatment data, tending average data, and aphid biomass data. [file peerj-10-14448-s005.xlsx]

## Sheet: AAI Treatment Data
Unit #	Aphid Location on Plant	Date	Sub Colony Identity	Total # Aphids on placement leaf (aphid_density)	Ant Treatment																																	Tended	Not Tended
15a	aphids at base of stem	2018-09-25	TCA_BR_5A x AC_34_a	20	yes
15b	aphids at base of leaf	2018-09-25	TCA_BR_5A x AC_34_b	19	yes
15ca	control at base of stem	2018-09-25	AC_34_control_a	50	no
15cb	control at base of leaf	2018-09-25	AC_34_control_b	18	no
16a	aphids at base of stem	2018-09-25	TCA_BR_5B x AC_20_a	22	yes
16b	aphids at base of leaf	2018-09-25	TCA_BR_5B x AC_20_b	3	yes
16ca	base of stem	2018-09-25	AC_20_control_a	14	no
16cb	bsae of leaf	2018-09-25	AC_20_control_b	2	no
15a	aphids at base of stem	2018-09-26	TCA_BR_5A x AC_34_a	24	yes
15b	aphids at base of leaf	2018-09-26	TCA_BR_5A x AC_34_b	35	yes
15ca	control at base of stem	2018-09-26	AC_34_control_a	74	no
15cb	control at base of leaf	2018-09-26	AC_34_control_b	33	no
16a	aphids at base of stem	2018-09-26	TCA_BR_5B x AC_20_a	32	yes
16b	aphids at base of leaf	2018-09-26	TCA_BR_5B x AC_20_b	10	yes
16ca	aphids at base of stem	2018-09-26	AC_20_control_a	25	no
16cb	aphids at base of leaf	2018-09-26	AC_20_control_b	7	no
15a	on base of stem	2018-09-27	TCA_BR_5A x AC_34_a	49	yes
15b	on base of leaf	2018-09-27	TCA_BR_5A x AC_34_b	36	yes
15ca	on base of stem	2018-09-27	AC_34_control_a	87	no
15cb	on base of leaf	2018-09-27	AC_34_control_b	40	no
16a	on base of stem	2018-09-27	TCA_BR_5B x AC_20_a	46	yes
16b	on base of leaf	2018-09-27	TCA_BR_5B x AC_20_b	14	yes
16ca	on base of stem	2018-09-27	AC_20_control_a	29	no
16cb	on base of leaf	2018-09-27	AC_20_control_b	9	no
15a	on base of stem	2018-09-28	TCA_BR_5A x AC_34a	57	yes
15b	on base of leaf	2018-09-28	TCA_BR_5A x AC_34b	73	yes
15ca	on base of stem	2018-09-28	AC_34a_control	49	no
15cb	on base of leaf	2018-09-28	AC_34b_control	98	no
16a	on base of stem	2018-09-28	TCA_BR_5B x AC_20_a	53	yes
16b	on base of leaf	2018-09-28	TCA_BR_5B x AC_20_b	12	yes
16ca	on base of stem	2018-09-28	AC_20_control_a	29	no
16cb	on base of leaf	2018-09-28	AC_20_control_b	9	no
17a	on base of stem	2018-10-09	TCA_BR_6A x AC_20a	21	yes
17b	on base of leaf	2018-10-09	TCA_BR_6A x AC_20b	45	yes
17ca	on base of stem	2018-10-09	AC_20a_control	6	no
17cb	on base of leaf	2018-10-09	AC_20b_control	38	no
18a	on base of stem	2018-10-09	TCA_BR_6B x AC_SCa	56	yes
18b	on base of leaf	2018-10-09	TCA_BR_6B x AC_SCb	43	yes
18ca	on base of stem	2018-10-09	AC_SCa_control	13	no
18cb	on base of leaf	2018-10-09	AC_SCb_control	27	no
17a	on base of stem	2018-10-10	TCA_BR_6A x AC_20a	30	yes
17b	on base of leaf	2018-10-10	TCA_BR_6A x AC_20b	65	yes
17ca	on base of stem	2018-10-10	AC_20a_control	9	no
17cb	on base of leaf	2018-10-10	AC_20b_control	21	no
18a	on base of stem	2018-10-10	TCA_BR_6B x AC_SCa	65	yes
18b	on base of leaf	2018-10-10	TCA_BR_6B x AC_SCb	65	yes
18ca	on base of stem	2018-10-10	AC_SCa_control	18	no
18cb	on base of leaf	2018-10-10	AC_SCb_control	35	no
17a	on base of stem	2018-10-11	TCA_BR_6A x AC_20a	25	yes
17b	on base of leaf	2018-10-11	TCA_BR_6A x AC_20b	89	yes
17ca	on base of stem	2018-10-11	AC_20a_control	11	no
17cb	on base of leaf	2018-10-11	AC_20b_control	32	no
18a	on base of stem	2018-10-11	TCA_BR_6B x AC_SCa	78	yes
18b	on base of leaf	2018-10-11	TCA_BR_6B x AC_SCb	73	yes
18ca	on base of stem	2018-10-11	AC_SCa_control	26	no
18cb	on base of leaf	2018-10-11	AC_SCb_control	49	no
17a	on base of stem	2018-10-12	TCA_BR_6A x AC_20a	38	yes
17b	on base of leaf	2018-10-12	TCA_BR_6A x AC_20b	106	yes
17ca	on base of stem	2018-10-12	AC_20a_control	11	no
17cb	on base of leaf	2018-10-12	AC_20b_control	53	no
18a	on base of stem	2018-10-12	TCA_BR_6B x AC_SCa	69	yes
18b	on base of leaf	2018-10-12	TCA_BR_6B x AC_SCb	99	yes
18ca	on base of stem	2018-10-12	AC_SCa_control	35	no
18cb	on base of leaf	2018-10-12	AC_SCb_control	55	no
19a	on base of stem	2018-10-23	TCA_BR_7A x AC_Weslaco_a	17	yes
19b	on base of leaf	2018-10-23	TCA_BR_7A x AC_Weslaco_b	8	yes
19ca	base of stem	2018-10-23	AC_Weslaco_a_control	14	no
19cb	base of leaf	2018-10-23	AC_Weslaco_b_control	27	no
19a	on base of stem	2018-10-25	TCA_BR_7A x AC_Weslaco_a	42	yes
19b	on base of leaf	2018-10-25	TCA_BR_7A x AC_Weslaco_b	11	yes
19ca	base of stem	2018-10-25	AC_Weslaco_a_control	18	no
19cb	base of leaf	2018-10-25	AC_Weslaco_b_control	45	no
22a	base of stem	2019-08-09	TCA_BR_8A x AC_SC	3	yes
22b	base of leaf	2019-08-09	TCA_BR_8A x AC_SC	2	yes
22ca	base of stem	2019-08-09	AC_SC_control	3	no
22cb	base of leaf	2019-08-09	AC_SC_control	3	no
23a	base of stem	2019-08-09	TCA_BR_8Bx AC_JJJ2_CS	12	yes
23b	base of leaf	2019-08-09	TCA_BR_8Bx AC_JJJ2_CS	10	yes
23ca	base of stem	2019-08-09	AC_JJJ2_CS_control	15	no
23cb	base of leaf	2019-08-09	AC_JJJ2_CS_control	20	no
22a	base of stem	2019-08-10	TCA_BR_8A x AC_SC	25	yes
22b	base of leaf	2019-08-10	TCA_BR_8A x AC_SC	9	yes
22ca	base of stem	2019-08-10	AC_SC_control	15	no
22cb	base of leaf	2019-08-10	AC_SC_control	54	no
23a	base of stem	2019-08-10	TCA_BR_8Bx AC_JJJ2_CS	6	yes
23b	base of leaf	2019-08-10	TCA_BR_8Bx AC_JJJ2_CS	13	yes
23ca	base of stem	2019-08-10	AC_JJJ2_CS_control	2	no
23cb	base of leaf	2019-08-10	AC_JJJ2_CS_control	10	no
22a	base of stem	2019-08-11	TCA_BR_8A x AC_SC	7	yes
22b	base of leaf	2019-08-11	TCA_BR_8A x AC_SC	20	yes
22ca	base of stem	2019-08-11	AC_SC_control	5	no
22cb	base of leaf	2019-08-11	AC_SC_control	15	no
23a	base of stem	2019-08-11	TCA_BR_8Bx AC_JJJ2_CS	23	yes
23b	base of leaf	2019-08-11	TCA_BR_8Bx AC_JJJ2_CS	50	yes
23ca	base of stem	2019-08-11	AC_JJJ2_CS_control	40	no
23cb	base of leaf	2019-08-11	AC_JJJ2_CS_control	86	no
22a	base of stem	2019-08-12	TCA_BR_8A x AC_SC	7	yes
22b	base of leaf	2019-08-12	TCA_BR_8A x AC_SC	22	yes
22ca	base of stem	2019-08-12	AC_SC_control	4	no
22cb	base of leaf	2019-08-12	AC_SC_control	19	no
23a	base of stem	2019-08-12	TCA_BR_8Bx AC_JJJ2_CS	9	yes
23b	base of leaf	2019-08-12	TCA_BR_8Bx AC_JJJ2_CS	72	yes
23ca	base of stem	2019-08-12	AC_JJJ2_CS_control	37	no
23cb	base of leaf	2019-08-12	AC_JJJ2_CS_control	83	no
25a	base of stem	2020-05-15	TCA_BR_6Ax AC_AG1	7	yes
25b	base of leaf	2020-05-15	TCA_BR_6Ax AC_AG1	2	yes
25ca	base of stem	2020-05-15	AC_AG1_control	9	no
25cb	base of leaf	2020-05-15	AC_AG1_control	4	no
26a	base of stem	2020-05-15	TCA_BR_6Bx AC_SC	8	yes
26b	base of leaf	2020-05-15	TCA_BR_6Bx AC_SC	20	yes
26ca	base of stem	2020-05-15	AC_SC_control	18	no
26cb	base of leaf	2020-05-15	AC_SC_control	22	no
25a	base of stem	2020-05-16	TCA_BR_6Ax AC_AG1	7	yes
25b	base of leaf	2020-05-16	TCA_BR_6Ax AC_AG1	7	yes
25ca	base of stem	2020-05-16	AC_AG1_control	32	no
25cb	base of leaf	2020-05-16	AC_AG1_control	64	no
26a	base of stem	2020-05-16	TCA_BR_6Bx AC_SC	38	yes
26b	base of leaf	2020-05-16	TCA_BR_6Bx AC_SC	58	yes
26ca	base of stem	2020-05-16	AC_SC_control	9	no
26cb	base of leaf	2020-05-16	AC_SC_control	10	no
25a	base of stem	2020-05-17	TCA_BR_6Ax AC_AG1	16	yes
25b	base of leaf	2020-05-17	TCA_BR_6Ax AC_AG1	10	yes
25ca	base of stem	2020-05-17	AC_AG1_control	13	no
25cb	base of leaf	2020-05-17	AC_AG1_control	8	no
26a	base of stem	2020-05-17	TCA_BR_6Bx AC_SC	45	yes
26b	base of leaf	2020-05-17	TCA_BR_6Bx AC_SC	95	yes
26ca	base of stem	17 May 2o20	AC_SC_control	84	no
26cb	base of leaf	2020-05-17	AC_SC_control	44	no
25a	base of stem	2020-05-18	TCA_BR_6Ax AC_AG1	22	yes
25b	base of leaf	2020-05-18	TCA_BR_6Ax AC_AG1	13	yes
25ca	base of stem	2020-05-18	AC_AG1_control	14	no
25cb	base of leaf	2020-05-18	AC_AG1_control	9	no
26a	base of stem	2020-05-18	TCA_BR_6Bx AC_SC	76	yes
26b	base of leaf	2020-05-18	TCA_BR_6Bx AC_SC	109	yes
26ca	base of stem	2020-05-18	AC_SC_control	87	no
26cb	base of leaf	2020-05-18	AC_SC_control	61	no
27a	base of stem	2020-05-23	TCA_BR_7Ax AC_AH1	42	yes
27b	base of leaf	2020-05-23	TCA_BR_7Ax AC_AH1	30	yes
27ca	base of stem	2020-05-23	AC_AH1_control	59	no
27cb	base of leaf	2020-05-23	AC_AH1_control	18	no
28a	base of stem	2020-05-23	TCA_BR_7Bx AC_SC	53	yes
28b	base of leaf	2020-05-23	TCA_BR_7Bx AC_SC	9	yes
28ca	base of stem	2020-05-23	AC_SC_control	38	no
28cb	base of leaf	2020-05-23	AC_SC_control	7	no
27a	base of stem	2020-05-24	TCA_BR_7Ax AC_AH1	105	yes
27b	base of leaf	2020-05-24	TCA_BR_7Ax AC_AH1	64	yes
27ca	base of stem	2020-05-24	AC_AH1_control	101	no
27cb	base of leaf	2020-05-24	AC_AH1_control	30	no
28a	base of stem	2020-05-24	TCA_BR_7Bx AC_SC	87	yes
28b	base of leaf	2020-05-24	TCA_BR_7Bx AC_SC	46	yes
28ca	base of stem	2020-05-24	AC_SC_control	77	no
28cb	base of leaf	2020-05-24	AC_SC_control	34	no
27a	base of stem	2020-05-25	TCA_BR_7Ax AC_AH1	64	yes
27b	base of leaf	2020-05-25	TCA_BR_7Ax AC_AH1	63	yes
27ca	base of stem	2020-05-25	AC_AH1_control	47	no
27cb	base of leaf	2020-05-25	AC_AH1_control	30	no
28a	base of stem	2020-05-25	TCA_BR_7Bx AC_SC	63	yes
28b	base of leaf	2020-05-25	TCA_BR_7Bx AC_SC	60	yes
28ca	base of stem	2020-05-25	AC_SC_control	58	no
28cb	base of leaf	2020-05-25	AC_SC_control	39	no
27a	base of stem	2020-05-26	TCA_BR_7Ax AC_AH1	62	yes
27b	base of leaf	2020-05-26	TCA_BR_7Ax AC_AH1	80	yes
27ca	base of stem	2020-05-26	AC_AH1_control	64	no
27cb	base of leaf	26 Msy 2020	AC_AH1_control	55	no
28a	base of stem	2020-05-26	TCA_BR_7Bx AC_SC	119	yes
28b	base of leaf	2020-05-26	TCA_BR_7Bx AC_SC	93	yes
28ca	base of stem	2020-05-26	AC_SC_control	87	no
28cb	base of leaf	2020-05-26	AC_SC_control	66	no
29a	base of stem	2020-06-13	TCA_BR_8Ax AC_SC	14	yes
29b	base of leaf	2020-06-13	TCA_BR_8Ax AC_SC	6	yes
29ca	base of stem	2020-06-13	AC_SC_control	13	no
29cb	base of leaf	2020-06-13	AC_SC_control	9	no
30a	base of stem	2020-06-13	TCA_BR_8Bx AC_AI1	14	yes
30b	base of leaf	2020-06-13	TCA_BR_8Bx AC_AI1	15	yes
30ca	base of stem	2020-06-13	AC_AI1_control	42	no
30cb	base of leaf	2020-06-13	AC_AI1_control	7	no
29a	base of stem	2020-06-14	TCA_BR_8Ax AC_SC	18	yes
29b	base of leaf	2020-06-14	TCA_BR_8Ax AC_SC	11	yes
29ca	base of stem	2020-06-14	AC_SC_control	20	no
29cb	base of leaf	2020-06-14	AC_SC_control	12	no
30a	base of stem	2020-06-14	TCA_BR_8Bx AC_AI1	26	yes
30b	base of leaf	2020-06-14	TCA_BR_8Bx AC_AI1	25	yes
30ca	base of stem	2020-06-14	AC_AI1_control	100	no
30cb	base of leaf	2020-06-14	AC_AI1_control	13	no
29a	base of stem	2020-06-15	TCA_BR_8Ax AC_SC	20	yes
29b	base of leaf	2020-06-15	TCA_BR_8Ax AC_SC	11	yes
29ca	base of stem	2020-06-15	AC_SC_control	79	no
29cb	base of leaf	2020-06-15	AC_SC_control	21	no
30a	base of stem	2020-06-15	TCA_BR_8Bx AC_AI1	42	yes
30b	base of leaf	2020-06-15	TCA_BR_8Bx AC_AI1	31	yes
30ca	base of stem	2020-06-15	AC_AI1_control	33	no
30cb	base of leaf	2020-06-15	AC_AI1_control	14	no
29a	base of stem	2020-06-16	TCA_BR_8Ax AC_SC	22	yes
29b	base of leaf	2020-06-16	TCA_BR_8Ax AC_SC	11	yes
29ca	base of stem	2020-06-16	AC_SC_control	58	no
29cb	base of leaf	2020-06-16	AC_SC_control	19	no
30a	base of stem	2020-06-16	TCA_BR_8Bx AC_AI1	62	yes
30b	base of leaf	2020-06-16	TCA_BR_8Bx AC_AI1	26	yes
30ca	base of stem	2020-06-16	AC_AI1_control	101	no
30cb	base of leaf	2020-06-16	AC_AI1_control	21	no

## Sheet: Average Tending Time
Unit #	Aphid Location on Plant	Date	Sub Colony Identity	Time Ants Spent Touching Aphids (out of 600 secs)	Averaged Time Ants Touched Aphids in 10 Minutes																																												Tended
15a	aphids at base of stem	25 Sep 2018 to 28 Sept 2018	TCA_BR_5A x AC_34a	4.78875	0.0798125
15b	aphids at base of leaf	25 Sep 2018 to 28 Sept 2018	TCA_BR_5A x AC_34b	49.193	0.819883
16a	aphids at base of stem	25 Sep 2018 to 28 Sept 2018	TCA_BR_5B x AC_20_a	0	0
16b	aphids at base of leaf	25 Sep 2018 to 28 Sept 2018	TCA_BR_5B x AC_20_b	0	0
17a	on base of stem	9 Oct 2018 to 12 Oct 2018	TCA_BR_6A x AC_20a	543.698	9.06163
17b	on base of leaf	9 Oct 2018 to 12 Oct 2018	TCA_BR_6A x AC_20b	300	5
18a	on base of stem	9 Oct 2018 to 12 Oct 2018	TCA_BR_6B x AC_SCa	46.21	0.770167
18b	on base of leaf	9 Oct 2018 to 12 Oct 2018	TCA_BR_6B x AC_SCb	90.8385	1.51397
19a	on base of stem	23 Oct 2018 to 25 Oct 2018	TCA_BR_7A x AC_Weslaco_a	2.7345	0.045575
19b	on base of leaf	23 Oct 2018 to 25 Oct 2018	TCA_BR_7A x AC_Weslaco_b	0	0
22a	base of stem	9 Aug 2019 to 12 Aug 2019	TCA_BR_8A x AC_SC	413.212	6.88687
22b	base of leaf	9 Aug 2019 to 12 Aug 2019	TCA_BR_8A x AC_SC	231.611	3.86019
23a	base of stem	9 Aug 2019 to 12 Aug 2019	TCA_BR_8Bx AC_JJJ2_CS	272.011	4.53352
23b	base of leaf	9 Aug 2019 to 12 Aug 2019	TCA_BR_8Bx AC_JJJ2_CS	126.487	2.10812
25a	base of stem	15 May 2020 to 18 May 2020	TCA_BR_6Ax AC_AG1	523.058	8.71763
25b	base of leaf	15 May 2020 to 18 May 2020	TCA_BR_6Ax AC_AG1	0	0
26a	base of stem	15 May 2020 to 18 May 2020	TCA_BR_6Bx AC_SC	448.084	7.46807
26b	base of leaf	15 May 2020 to 18 May 2020	TCA_BR_6Bx AC_SC	0	0
27a	base of stem	23 May 2020 to 26 May 2020	TCA_BR_7Ax AC_AH1	582.986	9.71644
27b	base of leaf	23 May 2020 to 26 May 2020	TCA_BR_7Ax AC_AH1	254.315	4.23859
28a	base of stem	23 May 2020 to 26 May 2020	TCA_BR_7Bx AC_SC	548.877	9.14796
28b	base of leaf	23 May 2020 to 26 May 2020	TCA_BR_7Bx AC_SC	119.011	1.98352
29a	base of stem	13 June 2020 to 16 June 2020	TCA_BR_8Ax AC_SC	363.899	6.06599
29b	base of leaf	13 June 2020 to 16 June 2020	TCA_BR_8Ax AC_SC	0	0
30a	base of stem	13 June 2020 to 16 June 2020	TCA_BR_8Bx AC_AI1	151.155	2.51925
30b	base of leaf	13 June 2020 to 16 June 2020	TCA_BR_8Bx AC_AI1	0	0
[truncated: 1 more columns]

## Sheet: Aphid Biomass
Unit	Aphid Location on Plant	Date	Aphid biomass observation area (mg) w/acetone evaporated	Aphid biomass entire plant (mg) w/ acetone evaporated	weigh boat (mg)	Weigh boat with aphids (mg)																																		Tended	Not Tended
15a	on base of stem	25 Sep 2018 to 28 Sept 2018	0.78	4.107	82.399	83.184
15b	on base of leaf	25 Sep 2018 to 28 Sept 2018	3.29	4.11	89.056	92.341
15r	rest of plant	25 Sep 2018 to 28 Sept 2018	0.037	4.11	17.253	17.29
15ca	on base of stem	25 Sep 2018 to 28 Sept 2018	6.34	8.008	104.02	110.356
15cb	on base of leaf	25 Sep 2018 to 28 Sept 2018	1.57	8.01	85.049	86.62
15cr	rest of plant	25 Sep 2018 to 28 Sept 2018	0.1	8.01	79.091	79.189
16a	on base of stem	25 Sep 2018 to 28 Sept 2018	2.89	4.15	88.849	91.736
16b	on base of leaf	25 Sep 2018 to 28 Sept 2018	0.77	4.15	110.163	110.933
16r	rest of plant	25 Sep 2018 to 28 Sept 2018	0.49	4.15	87.541	88.02
16ca	on base of stem	25 Sep 2018 to 28 Sept 2018	0.34	1.082	30.343	30.688
16cb	on base of leaf	25 Sep 2018 to 28 Sept 2018	0.48	1.08	26.295	26.775
16cr	rest of plant	25 Sep 2018 to 28 Sept 2018	0.26	1.08	29.288	29.55
17a	on base of stem	9 Oct 2018 to 12 Oct 2018	2.2	6.807	112.4	114.597
17b	on base of leaf	9 Oct 2018 to 12 Oct 2018	4.49	6.81	112.4	116.887
17r	rest of plant	9 Oct 2018 to 12 Oct 2018	0.117	6.81	.	.
17ca	on base of stem	9 Oct 2018 to 12 Oct 2018	1.37	4.18	79.072	80.443
17cb	on base of leaf	9 Oct 2018 to 12 Oct 2018	2.62	4.18	87.363	89.984
17cr	rest of plant	9 Oct 2018 to 12 Oct 2018	0.19	4.18	30.68	30.87
18a	on base of stem	9 Oct 2018 to 12 Oct 2018	1.795	5.49	86.61	88.405
18b	on base of leaf	9 Oct 2018 to 12 Oct 2018	2.382	5.486	36.071	38.453
18r	rest of plant	9 Oct 2018 to 12 Oct 2018	1.309	5.49	62.106	63.415
18ca	on base of stem	9 Oct 2018 to 12 Oct 2018	1.473	3.97	27.826	29.299
18cb	on base of leaf	9 Oct 2018 to 12 Oct 2018	1.698	3.971	30.257	31.955
18cr	rest of plant	9 Oct 2018 to 12 Oct 2018	0.8	3.97	31.618	32.419
19a	on base of stem	23 Oct 2018 to 25 Oct 2018	5.14	7.454	79.27	84.407
19b	on base of leaf	23 Oct 2018 to 25 Oct 2018	1.8	7.45	79.27	81.072
19r	rest of plant	23 Oct 2018 to 25 Oct 2018	0.514	7.45	.	.
19ca	base of stem	23 Oct 2018 to 25 Oct 2018	2.59	5.99	93.427	96.019
19cb	base of leaf	23 Oct 2018 to 25 Oct 2018	3.4	5.99	88.9	92.297
19cr	rest of plant	23 Oct 2018 to 25 Oct 2018	0	5.99	0	0
22a	base of stem	9 Aug 2019 to 12 Aug 2019	1.4	2.84	67.069	68.467
22b	base of leaf	9 Aug 2019 to 12 Aug 2019	1.32	2.84	64.172	65.487
22r	rest of plant	9 Aug 2019 to 12 Aug 2019	0.12	2.84	36.348	36.465
22ca	base of stem	9 Aug 2019 to 12 Aug 2019	2.23	3.255	60.154	62.386
22cb	base of leaf	9 Aug 2019 to 12 Aug 2019	0.26	3.26	63.715	63.972
22cr	rest of plant	9 Aug 2019 to 12 Aug 2019	0.77	3.26	77.372	78.137
23a	base of stem	9 Aug 2019 to 12 Aug 2019	3.36	9.73	58.046	61.403
23b	base of leaf	9 Aug 2019 to 12 Aug 2019	3.17	9.73	42.583	45.749
23r	rest of plant	9 Aug 2019 to 12 Aug 2019	3.2	9.73	.	.
23ca	base of stem	9 Aug 2019 to 12 Aug 2019	1.14	5.336	26.715	27.858
23cb	base of leaf	9 Aug 2019 to 12 Aug 2019	2.78	5.336	30.258	33.042
23cr	rest of plant	9 Aug 2019 to 12 Aug 2019	1.416	5.34	28.106	29.522
25a	base of stem	15 May 2020 to 18 May 2020	9.66	16.52	31.805	41.462
25b	base of leaf	15 May 2020 to 18 May 2020	0.81	16.52	31.408	32.218
25r	rest of plant	15 May 2020 to 18 May 2020	6.05	16.52	29.345	35.392
25ca	base of stem	15 May 2020 to 18 May 2020	0.32	2.46	26.963	27.285
25cb	base of leaf	15 May 2020 to 18 May 2020	0.1	2.46	22.066	22.166
25cr	rest of plant	15 May 2020 to 18 May 2020	2.04	2.46	22.214	24.256
26a	base of stem	15 May 2020 to 18 May 2020	2.74	6.02	47.735	50.47
26b	base of leaf	15 May 2020 to 18 May 2020	2.57	6.02	47.605	50.176
26r	rest of plant	15 May 2020 to 18 May 2020	0.71	6.02	54.899	55.605
26ca	base of stem	15 May 2020 to 18 May 2020	3.49	6.19	59.545	63.038
26cb	base of leaf	15 May 2020 to 18 May 2020	1.96	6.19	56.53	58.491
26cr	rest of plant	15 May 2020 to 18 May 2020	0.74	6.19	42.47	43.212
27a	base of stem	23 May 2020 to 26 May 2020	4.05	7.4	54.098	58.145
27b	base of leaf	23 May 2020 to 26 May 2020	2.23	7.4	40.017	42.247
27r	rest of plant	23 May 2020 to 26 May 2020	1.12	7.4	41.266	42.39
27ca	base of stem	23 May 2020 to 26 May 2020	6.19	9.74	50.288	56.48
27cb	base of leaf	23 May 2020 to 26 May 2020	1.86	9.74	42.699	44.562
27cr	rest of plant	23 May 2020 to 26 May 2020	1.69	9.74	58.543	60.232
28a	base of stem	23 May 2020 to 26 May 2020	1.95	6.36	54.286	56.234
28b	base of leaf	23 May 2020 to 26 May 2020	3.91	6.36	53.925	57.839
28r	rest of plant	23 May 2020 to 26 May 2020	0.5	6.36	58.164	58.661
28ca	base of stem	23 May 2020 to 26 May 2020	3.73	7.42	46.612	50.346
28cb	base of leaf	23 May 2020 to 26 May 2020	2.39	7.42	49.193	51.58
28cr	rest of plant	23 May 2020 to 26 May 2020	1.3	7.42	48.432	49.736
29a	base of stem	13 June 2020 to 16 June 2020	0.8	1.3	52.779	53.578
29b	base of leaf	13 June 2020 to 16 June 2020	0.48	1.3	57.789	58.273
29r	rest of plant	13 June 2020 to 16 June 2020	0.02	1.3	57.92	57.939
29ca	base of stem	13 June 2020 to 16 June 2020	2.56	3.64	43.681	46.245
29cb	base of leaf	13 June 2020 to 16 June 2020	0.78	3.64	57.523	58.304
29cr	rest of plant	13 June 2020 to 16 June 2020	0.3	3.64	49.387	49.69
30a	base of stem	13 June 2020 to 16 June 2020	3.96	6.38	57.23	61.188
30b	base of leaf	13 June 2020 to 16 June 2020	1.85	6.38	59.039	60.889
30r	rest of plant	13 June 2020 to 16 June 2020	0.57	6.38	74.992	75.564
30ca	base of stem	13 June 2020 to 16 June 2020	5.33	7.57	80.224	85.553
30cb	base of leaf	13 June 2020 to 16 June 2020	0.94	7.57	73.732	74.676
30cr	rest of plant	13 June 2020 to 16 June 2020	1.3	7.57	71.958	73.258
